# Supplementary material
Source: publisher site journal article supplement (https://www.dovepress.com/article/242754)
Supplement: Supplementary file 1 [file get_supplementary_file.php]

## Appendix 1. Search Strategy

### Medline

| #  | Search term                                  | Results |
|----|----------------------------------------------|---------|
| 1  | exp Testicular Neoplasms/                    | 25770   |
| 2  | (testic* cancer or testis cancer*).tw.       | 6266    |
| 3  | (testic* tumor or testis tumo?r*).tw.        | 2170    |
| 4  | (testic* carcinoma or testis carcinoma*).tw. | 578     |
| 5  | (testic* malignan* or testis malignan*).tw.  | 408     |
| 6  | testicular germ cell tumo?r*.tw.             | 2560    |
| 7  | urological cancer*.tw.                       | 816     |
| 8  | genitourinary cancer*.tw.                    | 633     |
| 9  | testicular cancer.mp.                        | 5913    |
| 10 | seminoma*.tw.                                | 7171    |
| 11 | non seminoma*.tw.                            | 1749    |
| 12 | sertoli cell*.tw.                            | 11442   |
| 13 | leydig cell.tw.                              | 5665    |
| 14 | or/1-13                                      | 45269   |
| 15 | Quality of Life/                             | 189212  |
| 16 | patient reported outcome measures/           | 5109    |
| 17 | (patient adj1 rated).tw.                     | 1975    |
| 18 | patient-reported outcome*.tw.                | 16271   |
| 19 | (patient adj1 reported).tw.                  | 31769   |
| 20 | quality of life.tw.                          | 267991  |
| 21 | self-rated.tw.                               | 13158   |
| 22 | self-report*.tw.                             | 150544  |
| 23 | QL.tw.                                       | 1491    |
| 24 | QOL.tw.                                      | 36841   |
| 25 | HRQL.tw.                                     | 3398    |
| 26 | HRQOL.tw.                                    | 15703   |
| 27 | PROM.tw.                                     | 2658    |
| 28 | PRO.tw.                                      | 187611  |
| 29 | health status/                               | 79884   |
| 30 | health status.tw.                            | 56168   |

|    |              |        |
|----|--------------|--------|
| 31 | or/15-30     | 764087 |
| 32 | trial.tw.    | 581995 |
| 33 | randomi*.tw. | 623188 |
| 34 | 32 or 33     | 911335 |
| 35 | 14 and 31    | 791    |

## Database: CINAHL

| Search ID | Search Terms                                                                                                         | Actions   |
|-----------|----------------------------------------------------------------------------------------------------------------------|-----------|
| S26       | S13 AND S25                                                                                                          | (236)     |
| S25       | S14 OR S15 OR S16 OR S17 OR S18 OR S19 OR S20 OR S21 OR S22 OR S23 OR S24                                            | (337,323) |
| S24       | TI health status OR AB health status OR MH health status                                                             | (81,763)  |
| S23       | TI PROM OR AB PROM OR MH PROM                                                                                        | (1,639)   |
| S22       | TI PRO OR AB PRO OR MH PRO                                                                                           | (24,974)  |
| S21       | TI HRQOL OR AB HRQOL OR MH HRQOL                                                                                     | (7,732)   |
| S20       | TI HRQL OR AB HRQL OR MH HRQL                                                                                        | (1,468)   |
| S19       | TI qol OR AB qol OR MH qol                                                                                           | (16,038)  |
| S18       | TI QL OR AB QL OR MH QL                                                                                              | (364)     |
| S17       | TI self-report* OR AB self-report* OR MH self-report*                                                                | (84,658)  |
| S16       | TI self-rated OR AB self-rated OR MH self-rated                                                                      | (8,124)   |
| S15       | TI patient reported outcome measures OR AB patient reported outcome measures OR MH patient reported outcome measures | (3,244)   |
| S14       | TI "Quality of life" OR AB "Quality of life" OR MH "Quality of life"                                                 | (169,863) |
| S13       | S1 OR S2 OR S3 OR S4 OR S5 OR S6 OR S7 OR S8 OR S9 OR S10 OR S11 OR S12                                              | (4,703)   |
| S12       | TI leydig cells OR AB leydig cells OR MH leydig cells                                                                | (333)     |
| S11       | TI sertoli cell OR AB sertoli cell OR MH sertoli cell                                                                | (340)     |
| S10       | TI non seminoma OR AB non seminoma OR MH non seminoma                                                                | (68)      |
| S9        | TI seminoma OR AB seminoma OR MH seminoma                                                                            | (599)     |
| S8        | TI genitourinary cancer OR AB genitourinary cancer OR MH genitourinary cancer                                        | (303)     |

|    |                                                                                                    |         |
|----|----------------------------------------------------------------------------------------------------|---------|
| S7 | TI urological cancer OR AB urological cancer OR MH urological cancer                               | (233)   |
| S6 | TI testicular germ cell tumour OR AB testicular germ cell tumour OR MH testicular germ cell tumour | (270)   |
| S5 | TI testicular malignancy OR AB testicular malignancy OR MH testicular malignancy                   | (94)    |
| S4 | TI testicular carcinoma OR AB testicular carcinoma OR MH testicular carcinoma                      | (82)    |
| S3 | TI testicular tumour OR AB testicular tumour OR MH testicular tumour                               | (611)   |
| S2 | TI testicular neoplasms OR AB testicular neoplasms OR MH testicular neoplasms                      | (3,129) |
| S1 | TI testicular cancer OR AB testicular cancer OR MH testicular cancer                               | (1,439) |

## Embase

|   |                           |        |
|---|---------------------------|--------|
| 1 | exp Testicular Neoplasms/ | 31881  |
| 2 | testis cancer/            | 13116  |
| 3 | "quality of life"/        | 457768 |
| 4 | patient-reported outcome/ | 20862  |
| 5 | 1 or 2                    | 31881  |
| 6 | 3 or 4                    | 472126 |
| 7 | 5 and 6                   | 625    |
| 8 | remove duplicates from 7  | 620    |

## PubMed

((quality of life[MeSH Terms]) OR (patient reported outcome[MeSH Terms])) AND ((testis cancer[MeSH Terms] OR (testicular neoplasms[MeSH Terms])))

## Appendix 2: List of included studies.

1. Arai Y, Kawakita M, Hida S, Terachi T, Okada Y, Yoshida O. Psychosocial aspects in long-term survivors of testicular cancer. *J Urol*. 1996;155(2):574-8.
2. Brydoy M, Oldenburg J, Klepp O, Bremnes RM, Wist EA, Wentzel-Larsen T, et al. Observational study of prevalence of long-term Raynaud-like phenomena and neurological side effects in testicular cancer survivors. *Journal of the National Cancer Institute*. 2009;101(24):1682-95.
3. Bumbasirevic U, Bojanic N, Pekmezovic T, Janjic A, Janicic A, Milojevic B, et al. Health-related quality of life, depression, and sexual function in testicular cancer survivors in a developing country: a Serbian experience. *Support Care Cancer*. 2013;21(3):757-63.
4. Caffo O, Amichetti M, Tomio L, Galligioni E. Quality of life after radiotherapy for early-stage testicular seminoma. *Radiother Oncol*. 2001;59(1):13-20.
5. Dearnaley DP, Fossa SD, Kaye SB, Cullen MH, Harland SJ, Sokal MP, et al. Adjuvant bleomycin, vincristine and cisplatin (BOP) for high-risk stage I non-seminomatous germ cell tumours: a prospective trial (MRC TE17). *Br J Cancer*. 2005;92(12):2107-13.
6. de Wit R, Roberts JT, Wilkinson PM, de Mulder PH, Mead GM, Fossa SD, et al. Equivalence of three or four cycles of bleomycin, etoposide, and cisplatin chemotherapy and of a 3- or 5-day schedule in good-prognosis germ cell cancer: a randomized study of the European Organization for Research and Treatment of Cancer Genitourinary Tract Cancer Cooperative Group and the Medical Research Council. *J Clin Oncol*. 2001;19(6):1629-40.
7. Flechtner HH, Fischer F, Albers P, Hartmann M, Siener R. Quality-of-Life Analysis of the German Prospective Multicentre Trial of Single-cycle Adjuvant BEP Versus Retroperitoneal Lymph Node Dissection in Clinical Stage I Nonseminomatous Germ Cell Tumours. *Eur Urol*. 2016;69(3):518-25.
8. Fossa SD, Aass N, Kaalhus O. Testicular cancer in young Norwegians. *J Surg Oncol*. 1988;39(1):43-63.
9. Fossa SD, de Wit R, Roberts JT, Wilkinson PM, de Mulder PH, Mead GM, et al. Quality of life in good prognosis patients with metastatic germ cell cancer: a prospective study of the European Organization for Research and Treatment of Cancer Genitourinary Group/Medical Research Council Testicular Cancer Study Group (30941/TE20). *J Clin Oncol*. 2003;21(6):1107-18.
10. Fossa SD, Moynihan C, Serbouti S. Patients' and doctors' perception of long-term morbidity in patients with testicular cancer clinical stage I. A descriptive pilot study. *Support Care Cancer*. 1996;4(2):118-28.
11. Fung C, Sesso HD, Williams AM, Kerns SL, Monahan P, Abu Zaid M, et al. Multi-Institutional Assessment of Adverse Health Outcomes Among North American Testicular Cancer Survivors After Modern Cisplatin-Based Chemotherapy. *J Clin Oncol*. 2017;35(11):1211-22.
12. Gamulin M, Grgic M, Bisof V. Side effects of adjuvant radiotherapy in men with testicular seminoma stage I. *Arh Hig Rada Toksikol*. 2011;62(3):235-41.

13. Glendenning JL, Barbachano Y, Norman AR, Dearnaley DP, Horwich A, Huddart RA. Long-term neurologic and peripheral vascular toxicity after chemotherapy treatment of testicular cancer. *Cancer*. 2010;116(10):2322-31.
14. Grimison PS, Stockler MR, Thomson DB, Olver IN, Harvey VJ, Gebiski VJ, et al. Comparison of two standard chemotherapy regimens for good-prognosis germ cell tumors: updated analysis of a randomized trial. *Journal of the National Cancer Institute*. 2010;102(16):1253-62.
15. Hartmann JT, Albrecht C, Schmoll HJ, Kuczyk MA, Kollmannsberger C, Bokemeyer C. Long-term effects on sexual function and fertility after treatment of testicular cancer. *Br J Cancer*. 1999;80(5-6):801-7.
16. Huddart RA, Norman A, Moynihan C, Horwich A, Parker C, Nicholls E, et al. Fertility, gonadal and sexual function in survivors of testicular cancer. *Br J Cancer*. 2005;93(2):200-7.
17. Joly F, Heron JF, Kalusinski L, Bottet P, Brune D, Allouache N, et al. Quality of life in long-term survivors of testicular cancer: a population-based case-control study. *J Clin Oncol*. 2002;20(1):73-80.
18. Jones WG, Fossa SD, Mead GM, et al. Randomized trial of 30 versus 20 Gy in the adjuvant treatment of stage I Testicular Seminoma: a report on Medical Research Council Trial TE18, European Organisation for the Research and Treatment of Cancer Trial 30942 (ISRCTN18525328). *J Clin Oncol*. 2005;23(6):1200–1208. doi:10.1200/JCO.2005.08.003
19. Jonker-Pool G, van Basten JP, Hoekstra HJ, van Driel MF, Sleijfer DT, Koops HS, et al. Sexual functioning after treatment for testicular cancer: comparison of treatment modalities. *Cancer*. 1997;80(3):454-64.
20. Kaasa S, Aass N, Mastekaasa A, Lund E, Fossa SD. Psychosocial well-being in testicular cancer patients. *Eur J Cancer*. 1991;27(9):1091-5.
21. Kerns SL, Fung C, Monahan PO, Ardeshir-Rouhani-Fard S, Abu Zaid MI, Williams AM, et al. Cumulative burden of morbidity among testicular cancer survivors after standard cisplatin-based chemotherapy: A multi-institutional study. *J Clin Oncol*. 2018;36(15):1505-12.
22. Kim C, McGlynn KA, McCorkle R, Erickson RL, Niebuhr DW, Ma S, et al. Quality of life among testicular cancer survivors: a case-control study in the United States. *Qual Life Res*. 2011;20(10):1629-37.
23. Miyake H, Muramaki M, Eto H, Kamidono S, Hara I. Health-related quality of life after chemotherapy for advanced germ cell tumors: a comparison of standard-dose and high-dose chemotherapy. *Int J Urol*. 2004;11(7):542-6.
24. Mykletun A, Dahl AA, Haaland CF, Bremnes R, Dahl O, Klepp O, et al. Side effects and cancer-related stress determine quality of life in long-term survivors of testicular cancer. *J Clin Oncol*. 2005;23(13):3061-8.
25. Oechsle K, Hartmann M, Mehnert A, Oing C, Bokemeyer C, Vehling S. Symptom burden in long-term germ cell tumor survivors. *Support Care Cancer*. 2016;24(5):2243-50.
26. Oldenburg J, Fossa SD, Dahl AA. Scale for chemotherapy-induced long-term neurotoxicity (SCIN): psychometrics, validation, and findings in a large sample of testicular cancer survivors. *Qual Life Res*. 2006;15(5):791-800.

27. Oldenburg J, Kraggerud SM, Brydoy M, Cvancarova M, Lothe RA, Fossa SD. Association between long-term neuro-toxicities in testicular cancer survivors and polymorphisms in glutathione-s-transferase-P1 and -M1, a retrospective cross sectional study. *J. 2007*;5:70.
28. Oliver RT, Edmonds PM, Ong JY, Ostrowski MJ, Jackson AW, Baille-Johnson H, et al. Pilot studies of 2 and 1 course carboplatin as adjuvant for stage I seminoma: should it be tested in a randomized trial against radiotherapy? *Int J Radiat Oncol Biol Phys. 1994*;29(1):3-8.
29. Poulakis V, Skriapas K, de Vries R, Dillenburg W, Ferakis N, Witzsch U, et al. Quality of life after laparoscopic and open retroperitoneal lymph node dissection in clinical Stage I nonseminomatous germ cell tumor: a comparison study. *Urology. 2006*;68(1):154-60.
30. Rossen PB, Pedersen AF, Zachariae R, von der Maase H. Health-related quality of life in long-term survivors of testicular cancer. *J Clin Oncol. 2009*;27(35):5993-9.
31. Rudberg L, Carlsson M, Nilsson S, Wikblad K. Self-perceived physical, psychologic, and general symptoms in survivors of testicular cancer 3 to 13 years after treatment. *Cancer Nurs. 2002*;25(3):187-95.
32. Rudberg L, Nilsson S, Wikblad K. Health-related quality of life in survivors of testicular cancer 3 to 13 years after treatment. *Journal of Psychosocial Oncology. 2000*;18(3):19-31.
33. Schmidt AH, Hoyer M, Jensen BFS, Agerbaek M. Limited post-chemotherapy retroperitoneal resection of residual tumour in non-seminomatous testicular cancer: complications, outcome and quality of life. *Acta Oncol. 2018*;57(8):1084-93.
34. Skaali T, Foss SD, Dahl AA. A prospective study of cognitive complaints in patients with testicular cancer. *Clin Genitourin Cancer. 2011*;9(1):6-13.
35. Skaali T, Fossa SD, Andersson S, Cvancarova M, Langberg CW, Lehne G, et al. Self-reported cognitive problems in testicular cancer patients: relation to neuropsychological performance, fatigue, and psychological distress. *J Psychosom Res. 2011*;70(5):403-10.
36. Skalleberg J, Smastuen MC, Oldenburg J, Osnes T, Fossa SD, Bunne M. The Relationship Between Cisplatin-related and Age-related Hearing Loss During an Extended Follow-up. *Laryngoscope. 2020*;17:17.
37. Skoogh J, Steineck G, Stierner U, Cavallin-Stahl E, Wilderang U, Wallin A, et al. Testicular-cancer survivors experience compromised language following chemotherapy: findings in a Swedish population-based study 3-26 years after treatment. *Acta Oncol. 2012*;51(2):185-97.
38. Sprauten M, Darrah TH, Peterson DR, Campbell ME, Hannigan RE, Cvancarova M, et al. Impact of long-term serum platinum concentrations on neuro- and ototoxicity in Cisplatin-treated survivors of testicular cancer. *J Clin Oncol. 2012*;30(3):300-7.
39. Vidrine DJ, Hoekstra-Weebers JE, Hoekstra HJ, Tuinman MA, Marani S, Gritz ER. The effects of testicular cancer treatment on health-related quality of life. *Urology. 2010*;75(3):636-41.
40. Whitford HS, Kalinowski P, Schembri A, Grimison P, Stockler M, Martin A, et al. The impact of chemotherapy on cognitive function: a multicentre prospective cohort study in testicular cancer. *Supportive Care in Cancer. 2019*.
41. Wortel RC, Ghidry Alemayehu W, Incrocci L. Orchiectomy and radiotherapy for stage I-II testicular seminoma: a prospective evaluation of short-term effects on body image and sexual function. *J Sex Med. 2015*;12(1):210-8.
